# Supplementary material for: Could Dampening Expression of the Neisseria gonorrhoeae mtrCDE-Encoded Efflux Pump Be a Strategy To Preserve Currently or Resurrect Formerly Used Antibiotics To Treat Gonorrhea?
Source: PubMed Central journal article supplement (PMC6692510; doi:10.1128/mbio.01576-19), 2019-08-13
Supplement: mBio.01576-19-st001.pdf [file mBio.01576-19-st001.pdf]

**Table S1. Gene expression ratio of different genes under the induction of IPTG/without IPTG in SC4**

| <b>Target genes</b> | <b>Expression change<math>\pm</math>SD (IPTG+/IPTG-)</b> | <b>Significance*</b> |
|---------------------|----------------------------------------------------------|----------------------|
| <i>mtrR</i>         | 86.34 $\pm$ 11.22                                        | <0.001               |
| <i>mtrC</i>         | 0.3 $\pm$ 0.06                                           | <0.001               |
| <i>mtrE</i>         | 0.32 $\pm$ 0.12                                          | <0.001               |
| <i>farR</i>         | 0.53 $\pm$ 0.05                                          | <0.001               |
| <i>rpoH</i>         | 0.46 $\pm$ 0.08                                          | <0.001               |
| <i>penA</i>         | 1.09 $\pm$ 0.17                                          | 0.376                |
| <i>porB</i>         | 1.3 $\pm$ 0.4                                            | 0.267                |
| <i>gyrA</i>         | 0.99 $\pm$ 0.25                                          | 0.898                |
| <i>norM</i>         | 0.94 $\pm$ 0.08                                          | 0.254                |

\*P value was calculated by Student's t-test
