# Supplementary material for: Could Dampening Expression of the Neisseria gonorrhoeae mtrCDE-Encoded Efflux Pump Be a Strategy To Preserve Currently or Resurrect Formerly Used Antibiotics To Treat Gonorrhea?
Source: PubMed Central journal article supplement (PMC6692510; doi:10.1128/mbio.01576-19), 2019-08-13
Supplement: mBio.01576-19-st002.pdf [file mBio.01576-19-st002.pdf]

**TABLE S2. Oligonucleotides used in this study**

| Oligonucleotide | Sequence (5'→3')              |
|-----------------|-------------------------------|
| 5'mtrR          | GGTTAATTAACCGCCCTCGTCAAACCGA  |
| 3'mtrR          | GGGTTTAAACTTATTTCCGGCGCAGGCAG |
| MTRD1           | CGGCATCTGAAGCCAAACCTGC        |
| KanC            | GTGGTATGACATTGCCTTCTGCG       |
| LctP_F          | CGGTCCGATTCAGCAGCAA           |
| mtrR_qRT_F      | CTTGTTTGACGCGTTGTTCCA         |
| mtrR_qRT_R      | GTGGATGTCGTTGCTTTGCA          |
| mtrC_qRT_F      | CGGATTTGGCGCGTTACAAA          |
| mtrC_qRT_R      | TAATGCGCGAACGGTTCAGA          |
| mtrE_qRT_F      | TGTCTGCCTGCACCATGATT          |
| mtrE_qRT_R      | AGTGCGATGTCGATCAGCTT          |
| farR_qRT_F      | AGCCCTGATGACCCAATTCAG         |
| farR_qRT_R      | TTTCAAGGCGGGTCAGGATAC         |
| rpoH_qRT_F      | AACGGCAGCCTCGAACAATA          |
| rpoH_qRT_R      | GGTGGGACAGGATGAGTTGTT         |
| penA_qRT_F      | AGGTTGCCGAAGAGGTCAAA          |
| penA_qRT_R      | TTCCTGACCTTTGCCGTCAA          |
| porB_qRT_F      | ACAATCCTTCGTCGGCTTGA          |
| porB_qRT_R      | TCCAGCACATTGCCGGTAAA          |
| gyrA_qRT_F      | AAACTGACTCCGCTGCAAGA          |
| gyrA_qRT_R      | TTCATGGCGTGCCTTCTTCA          |
| norM_qRT_F      | ATGCTGCTCGACCTCGACC           |
| norM_qRT_R      | CATCACGGTATCGACGAAACCGATGCCC  |
| macA_qRT_F      | AATTCGACCACGCAGACCAA          |
| macA_qRT_R      | CTGCGCGCTTTCCAAATCTT          |
| 16S_qRT_F       | GTAGGGTGCGAGCGTTAATC          |
| 16S_qRT_R       | CATCGGTATTCCTCCACATCTC        |

\*Primers with ending letters qRT\_F or qRT\_R were used in qRT-PCR (see Table S1)
